# Supplementary material for: Highly dispersible polypyrrole nanospheres for advanced nanocomposite ultrafiltration membranes
Source: Royal Society of Chemistry journal article supplement (doi:10.1039/c3mh00049d), 2013-09-20
Supplement: c3mh00049d.pdf [file c3mh00049d.pdf]

# Supporting Information

## Highly Dispersible Polypyrrole Nanospheres for Advanced Nanocomposite Ultrafiltration Membranes

Yaozu Liao,<sup>\*a,b</sup> Thomas P. Farrell,<sup>a</sup> Gregory R. Guillen,<sup>c</sup> Minghua Li,<sup>c</sup> James A. T. Temple,<sup>c</sup> Xin-Gui Li,<sup>\*b</sup> Eric M. V. Hoek,<sup>\*c,d</sup> Richard B. Kaner<sup>\*a</sup>

<sup>a</sup>Department of Chemistry & Biochemistry and California NanoSystems Institute, University of California, Los Angeles, Los Angeles, California, 90095, USA;

<sup>b</sup>College of Materials Science & Engineering and Institute of Materials Chemistry, Tongji University, 1239 Si-Ping Road, Shanghai 200092, China;

<sup>c</sup>Department of Civil & Environmental Engineering, Institute of the Environment & Sustainability and California NanoSystems Institute, University of California, Los Angeles, California 90095, USA;

<sup>d</sup>Department of Applied Chemistry, University of Johannesburg, Johannesburg, South Africa.

\*Corresponding authors: [kaner@chem.ucla.edu](mailto:kaner@chem.ucla.edu), [emvhoek@ucla.edu](mailto:emvhoek@ucla.edu),

[yaozu.liao@gmail.com](mailto:yaozu.liao@gmail.com), [adamxgli@yahoo.com](mailto:adamxgli@yahoo.com)

### 1. Contrast Adjusted Surface SEM images of Membranes

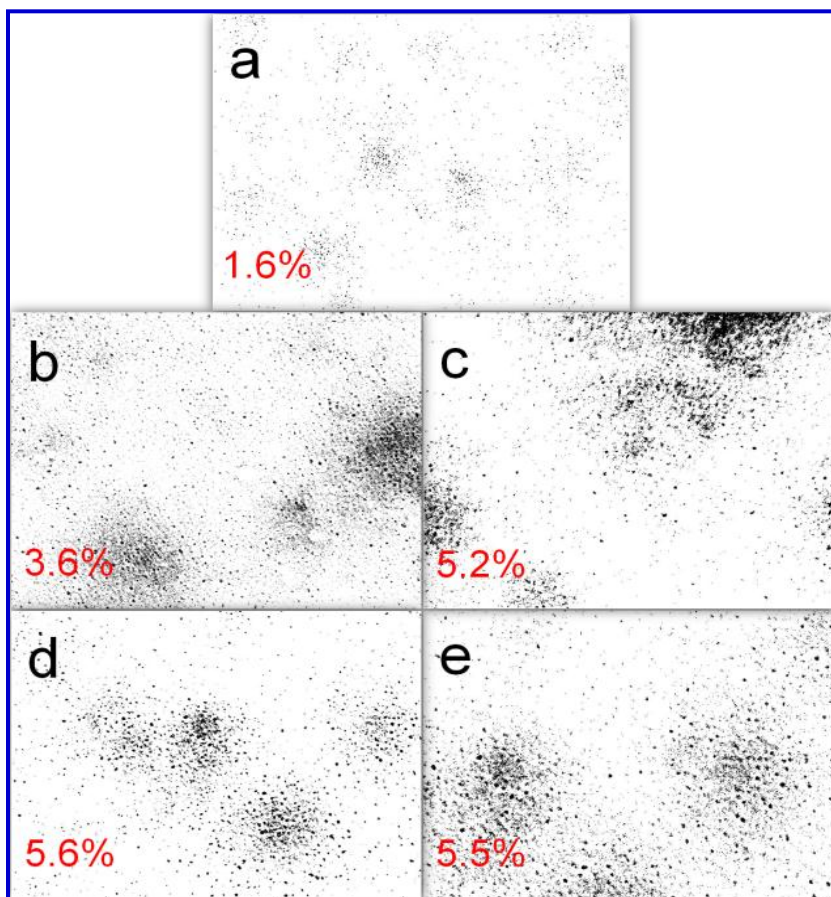

**Figure S1** Surface SEM images of PPy/PSf nanocomposite membranes prepared with the addition of the following concentrations of PPy nanospheres: (a) 0, (b) 2, (c) 4, (d) 10, and (e) 20%, after contrast adjusted by NIH ImageJ software.

## 2. AFM Morphologies and Histogram Analyses of the Membranes

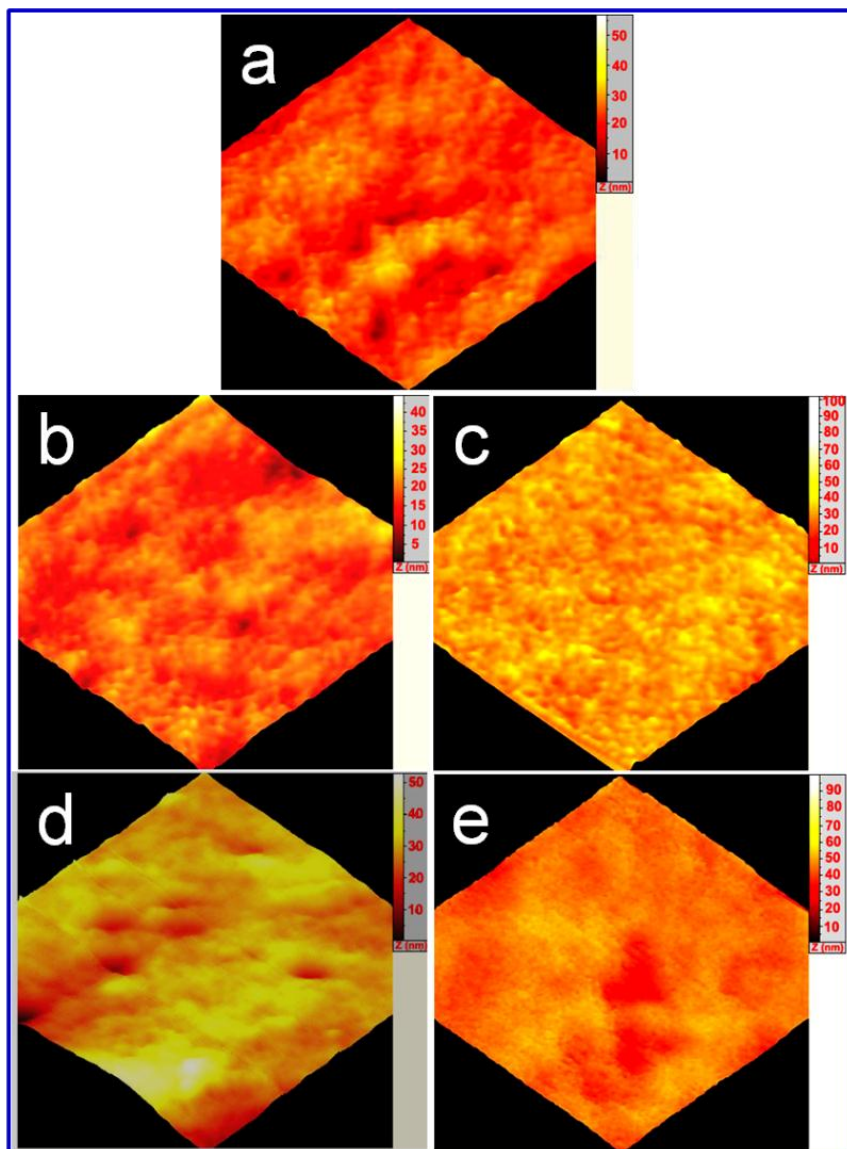

**Figure S2** AFM 3D images of (a) PSf and (b–e) PPy/PSf nanocomposite membranes with addition of the following concentrations of PPy nanospheres: (b) 2, (c) 4, (d) 10, and (e) 20%.

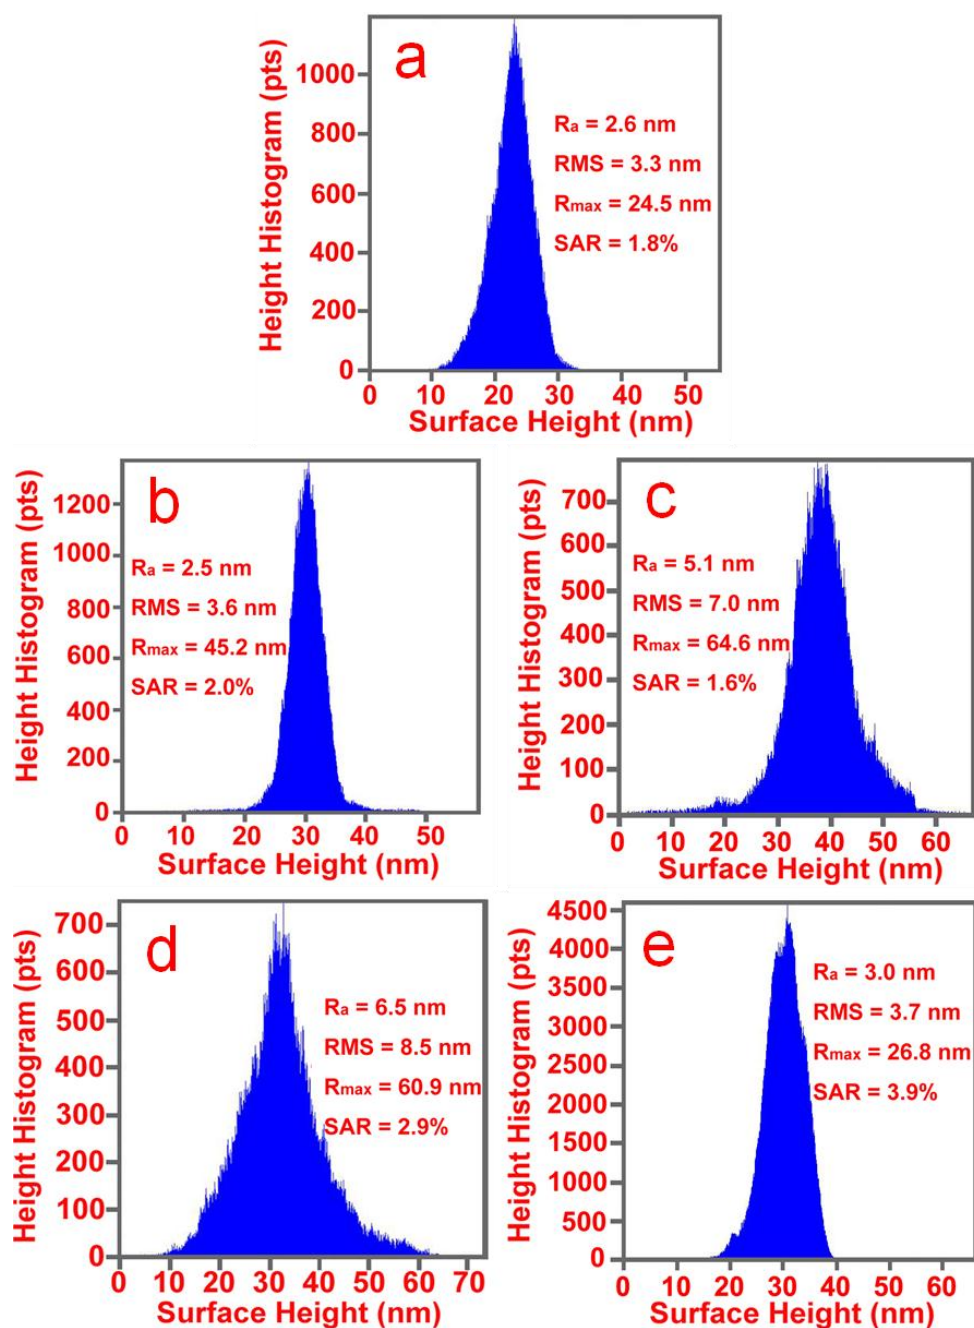

**Figure S3** Surface AFM histogram analyses of (a) PSf and (b–e) PPy/PSf nanocomposite membranes with the addition of the following concentrations of PPy nanospheres: (b) 2, (c) 4, (d) 10, and (e) 20%.

### 3. Cross-sectional and Surface SEM Morphologies of the Membranes

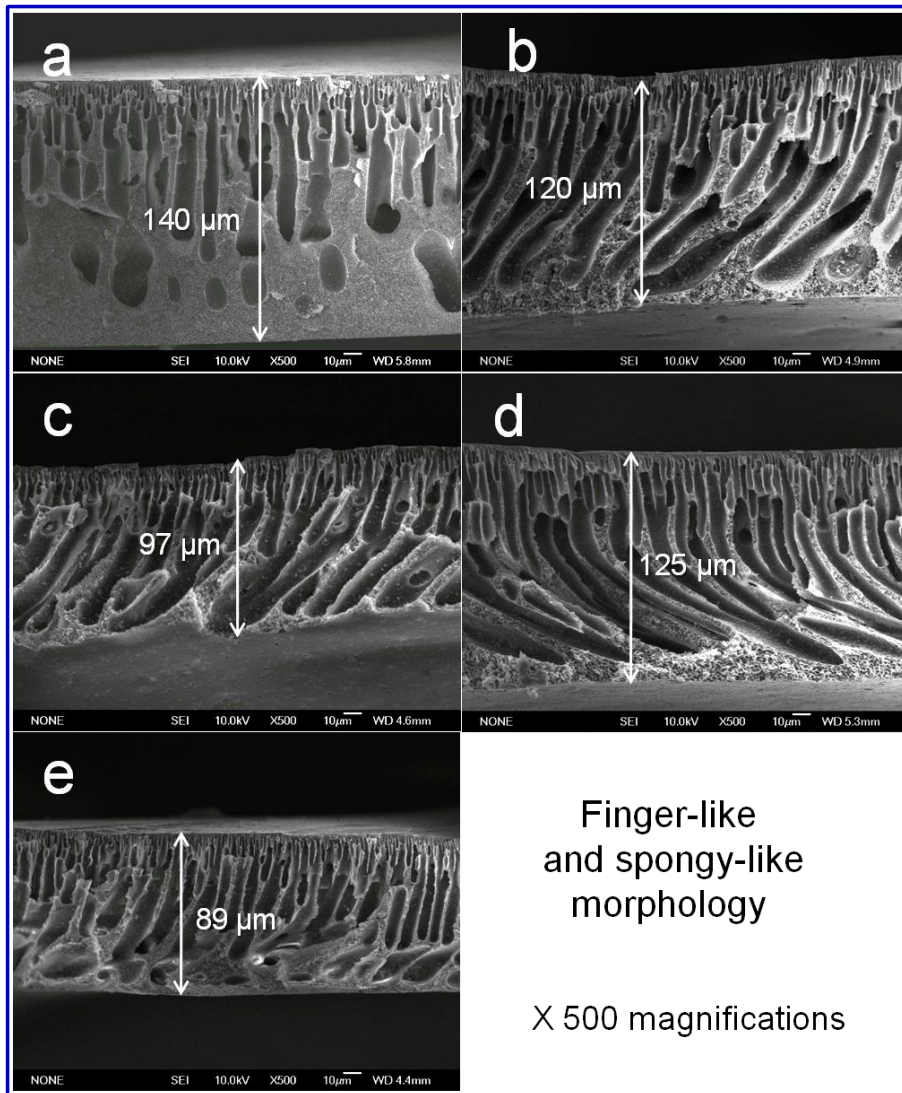

**Figure S4** Cross-sectional SEM images of (a) a pure PSf and (b–e) PPY/PSf nanocomposite membranes prepared with the following sizes of PPy nanospheres (4%): (b) 85, (c) 110, (d) 200, and (e) 220 nm synthesized with (b) HCl, (c) HNO<sub>3</sub>, (d) HClO<sub>4</sub>, and (e) CSA, respectively.



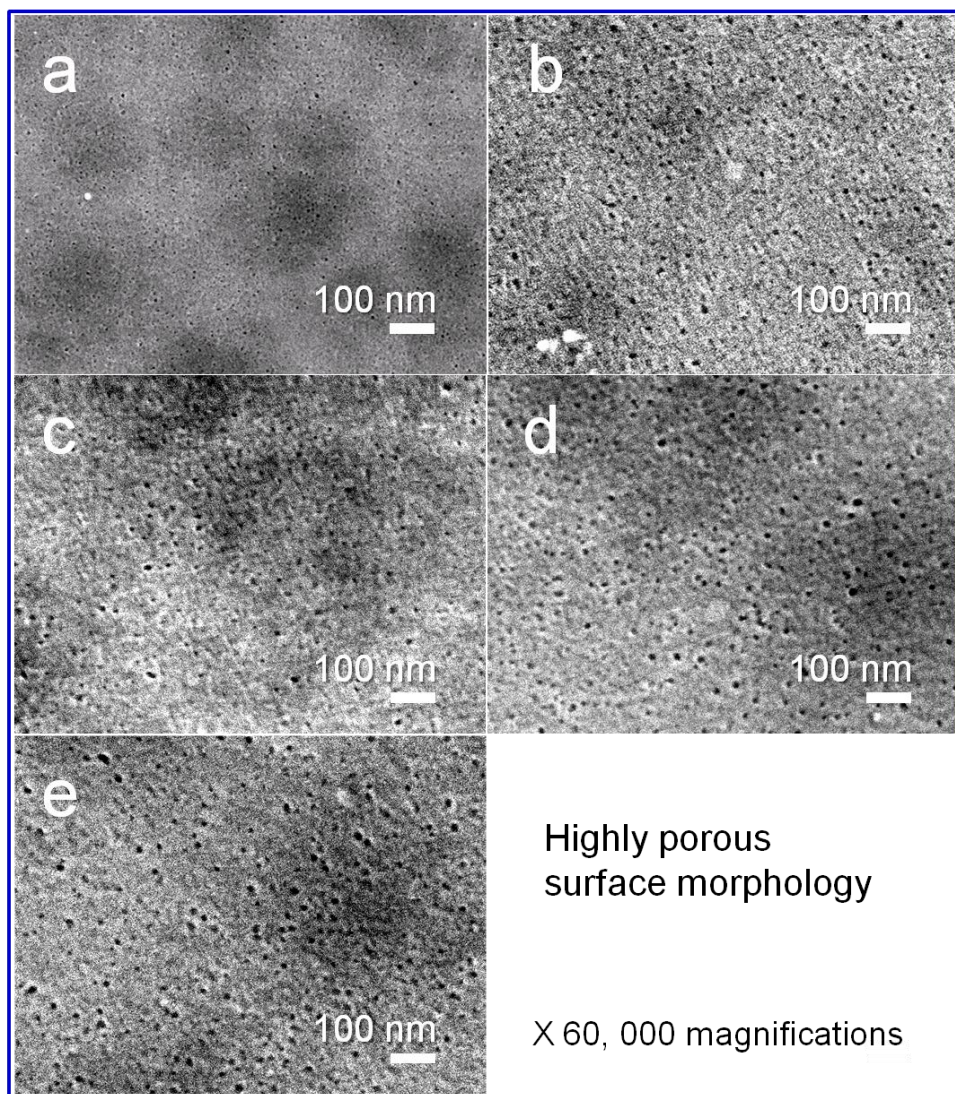

**Figure S5** Surface SEM images of (a) a pure PSf and (b–e) PPy/PSf nanocomposite membranes prepared with the following sizes of PPy nanospheres (4%): (b) 85, (c) 110, (d) 200, and (e) 220 nm synthesized with (b) HCl, (c) HNO<sub>3</sub>, (d) HClO<sub>4</sub>, and (e) CSA, respectively.

#### 4. Calculations of Surface Average Pore Diameters of the Membranes

The surface average pore diameters ( $d_p$ ) of the membranes can be approximately calculated from BSA rejection ( $r$ ) values on the basis of the equation,  $\lambda = 1 - \sqrt{1 - \sqrt{r}}$ , where  $\lambda = d_s/d_p$ ,  $d_s$  is BSA diameter of ~6 nm,  $0 < r < 1$ . The  $d_p$  values of the membranes are calculated by 7.0–8.2 nm, consistent with the values determined by SEM observations.

#### 5. Proposed Geometric Structure of the PPy/PSf Nanocomposite Membrane

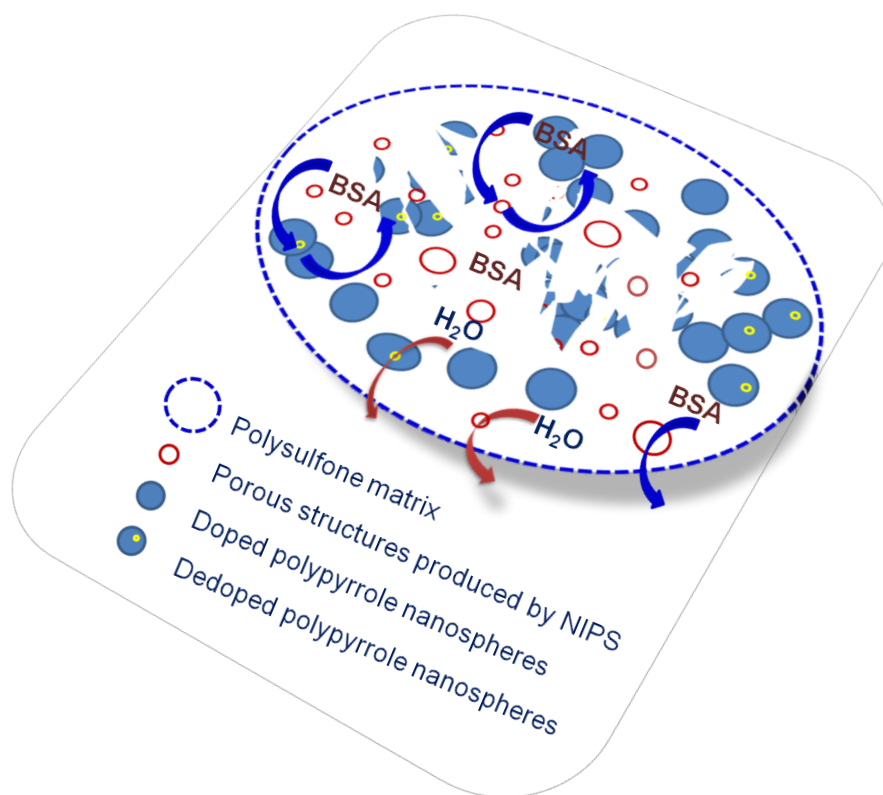

**Figure S6** A schematic diagram illustrating the geometric structure for a typical size selective PPy/PSf nanocomposite membrane. Small molecules such as water readily pass through the membrane, while big particles such as BSA are mostly rejected.
